# Supplementary material for: One-dimensional Cu–Ni core–shell composites as liquid epoxy molding compound fillers for enhanced heat dissipation and electromagnetic interference shielding in high-bandwidth memory
Source: Royal Society of Chemistry journal article supplement (doi:10.1039/d4tc04621h), 2024-12-16
Supplement: d4tc04621h1.pdf [file d4tc04621h1.pdf]

## Supporting Information

# One-dimensional Cu-Ni Core-shell Composites as Liquid Epoxy Molding Compound Fillers for Enhanced Heat Dissipation and Electromagnetic Interference Shielding in High-bandwidth Memory

Minkyu Kang,<sup>a,‡</sup> Minjun Bae,<sup>a,‡</sup> Sungho Cho,<sup>a</sup> Yonghwan Kim,<sup>a</sup> Kanghun Kim,<sup>a</sup> Jonghyock Park,<sup>a</sup> Won Young An,<sup>a</sup> Dohyeong Kim,<sup>a</sup> Yujin Chang,<sup>a</sup> Kyurim Kim,<sup>a</sup> Shuqing Piao,<sup>a</sup> Yongyeol Park,<sup>a</sup> and Yuanzhe Piao<sup>a,b,\*</sup>

<sup>a</sup> Department of Applied Bioengineering, Graduate School of Convergence Science and Technology, Seoul National University, 16229 Suwon-si, Gyeonggi-do, Republic of Korea.

<sup>b</sup> Advanced Institutes of Convergence Technology, Seoul National University, 16229 Suwon-si, Gyeonggi-do, Republic of Korea

‡ These authors contributed equally to this work.

## Corresponding authors

\* Yuanzhe Piao. E-mail: [parkat9@snu.ac.kr](mailto:parkat9@snu.ac.kr)

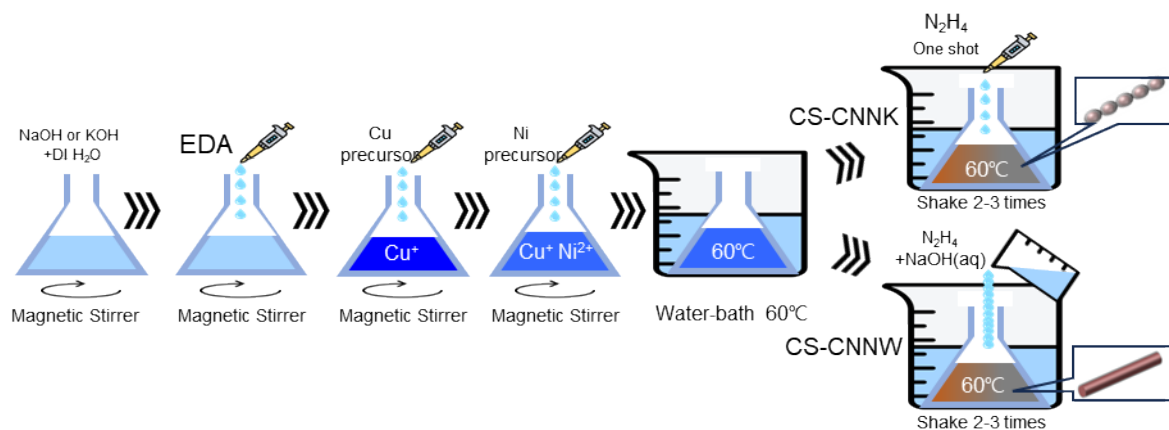

**Fig. S1.** Schematic diagram of the synthetic methods for 1D CS-CN nanoparticles.

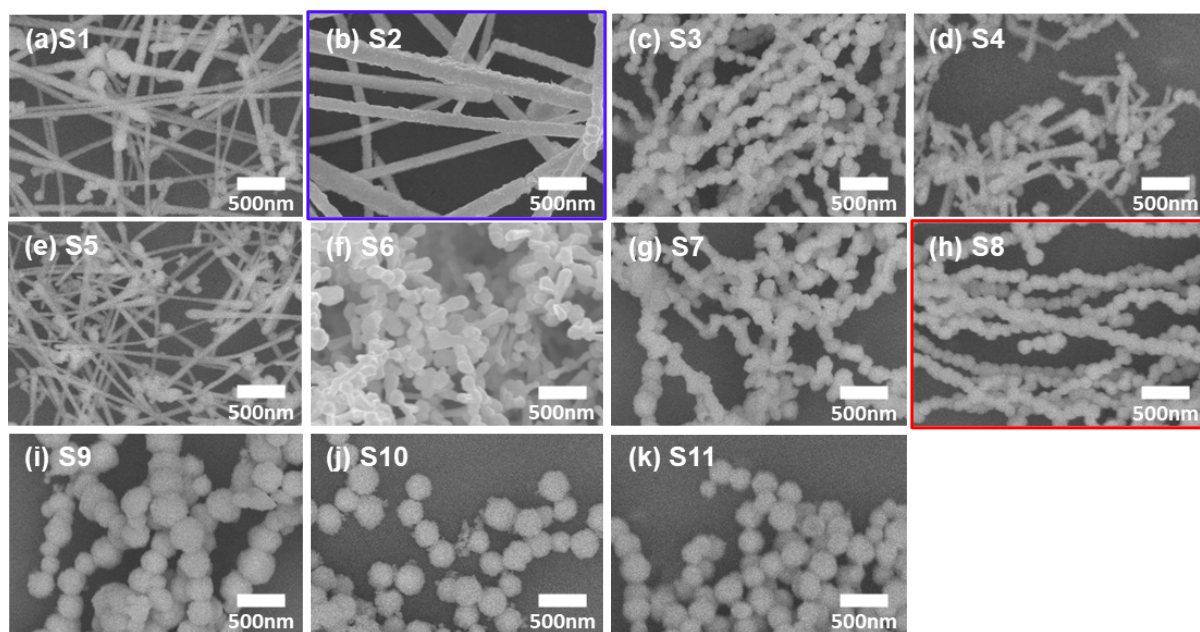

**Fig. S2.** Case study on the morphology of the resulting CS-CN nanoparticles under various experimental conditions as detailed in Table S1.

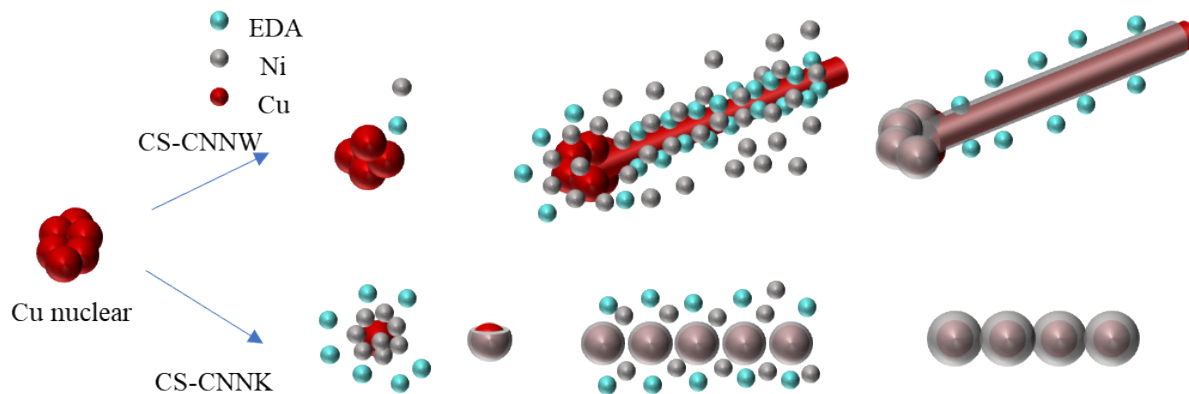

**Fig. S3.** Schematic illustration of the morphological changes in CS-CNNW and CS-CNNK.

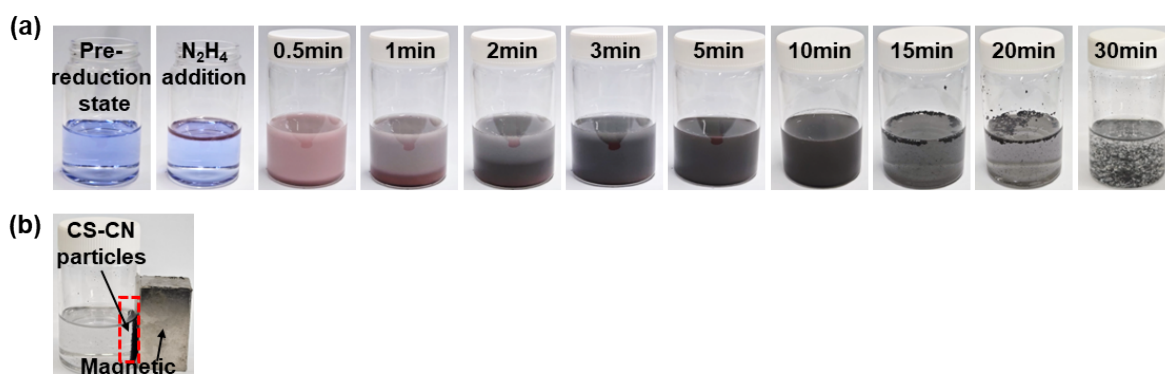

**Fig. S4.** (a) Time-dependent digital images of reactant mixtures after  $N_2H_4$  injection and (b) digital image of as-synthesized CS-CNNK particles attracted to a magnet.

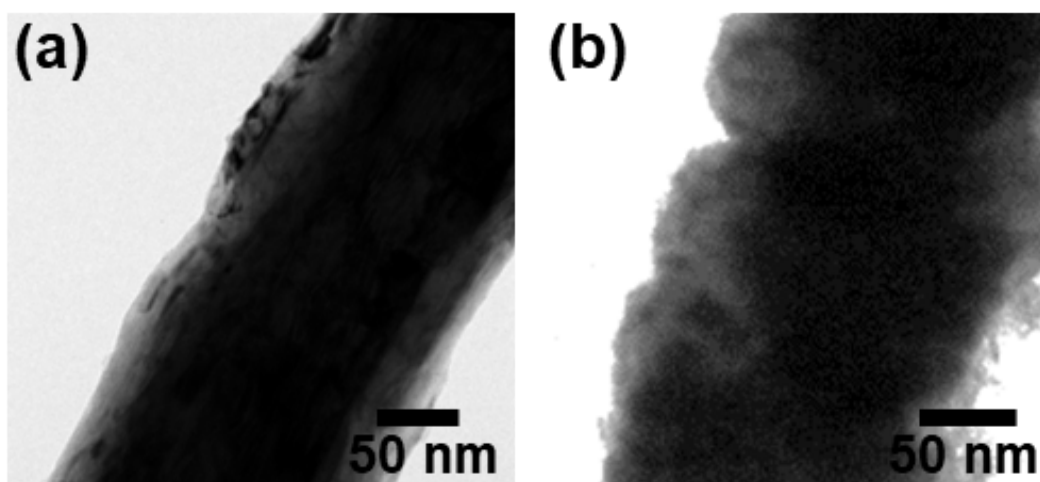

**Fig. S5.** (a) TEM images of (a) CS-CNNW and (b) CS-CNNK.

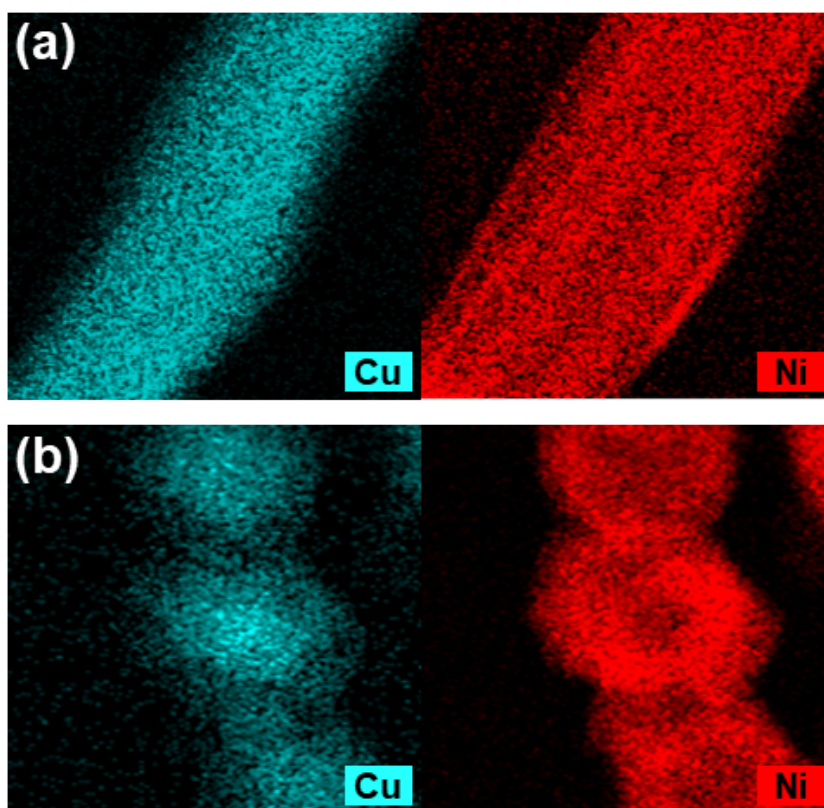

**Fig. S6.** EDS mapping images of (a) CS-CNNW and (b) CS-CNNK.

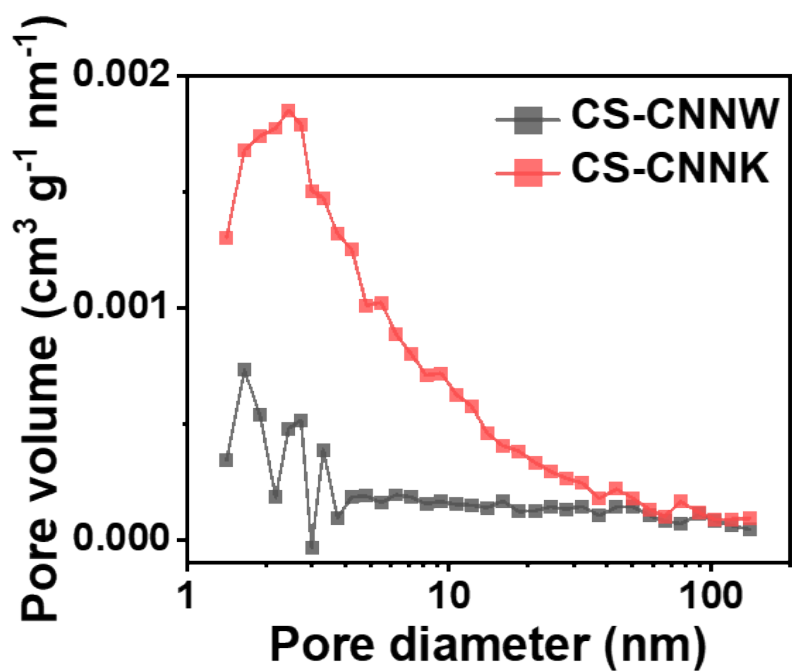

Fig. S7. BJH results for CS-CNNW and CS-CNNK.

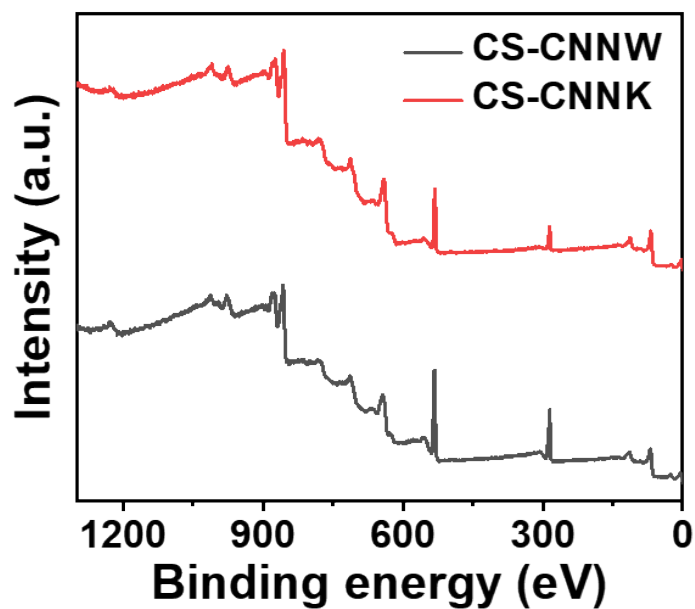

Fig. S8. XPS survey spectra of CS-CNNW and CS-CNNK.

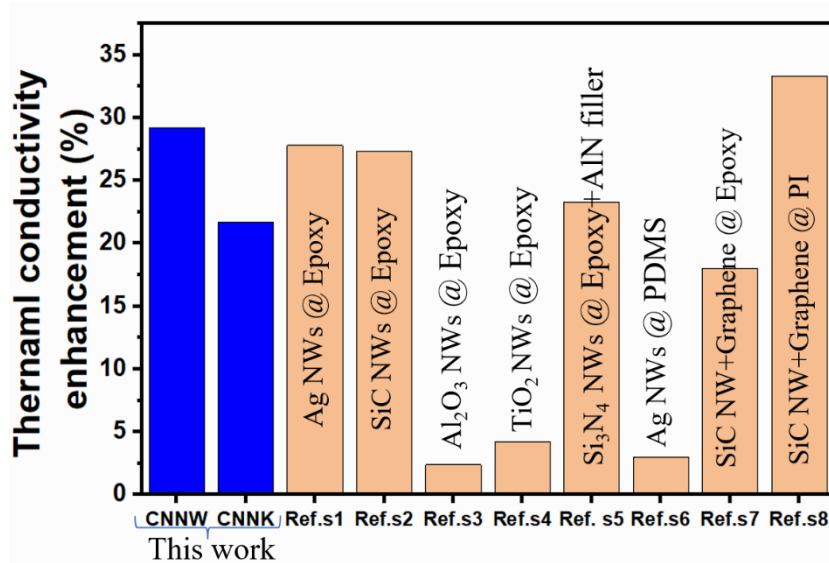

Fig. S9. Comparison plot of thermal conductivity enhancement, as shown in Table S5.

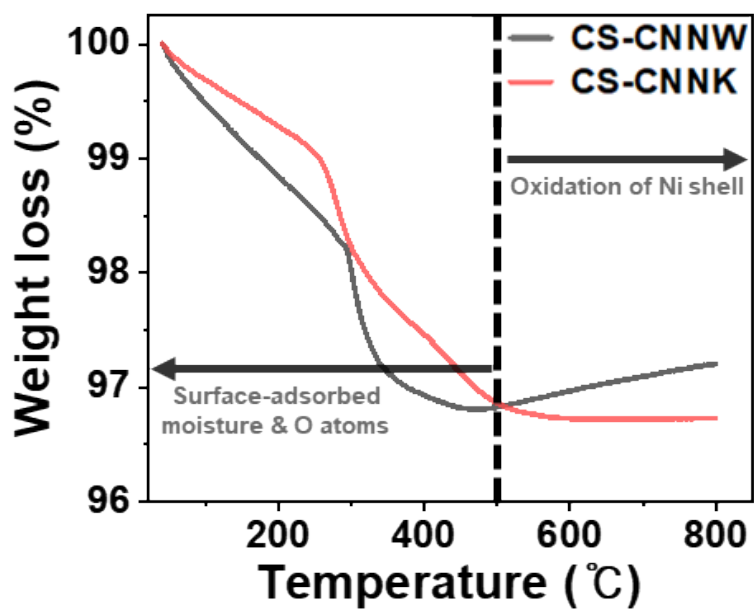

Fig. S10. TGA results for CS-CNNW and CS-CNNK.

**Table S1.** Case study for the morphology and yield optimization of 1D CS-CN nanoparticles.

| Sample | Base solution | Molarity (M) | Cu precursor                                         | Ni precursor                                         | Reductant injection type | Yield | Morphology            |
|--------|---------------|--------------|------------------------------------------------------|------------------------------------------------------|--------------------------|-------|-----------------------|
| S1     | NaOH          | 7            | $\text{Cu}(\text{NO}_3)_2 \cdot 3\text{H}_2\text{O}$ | $\text{Ni}(\text{NO}_3)_2 \cdot 6\text{H}_2\text{O}$ | Mixing                   | 61%   | CS-CNNW (non-uniform) |
| ★S2    | NaOH          | 7            | $\text{CuCl}_2 \cdot 2\text{H}_2\text{O}$            | $\text{NiCl}_2 \cdot 6\text{H}_2\text{O}$            | Mixing                   | 84%   | CS-CNNW (uniform)     |
| S3     | NaOH          | 7            | $\text{CuCl}_2 \cdot 2\text{H}_2\text{O}$            | $\text{NiCl}_2 \cdot 6\text{H}_2\text{O}$            | One shot                 | 92%   | CS-CNNK (non-uniform) |
| S4     | KOH           | 7            | $\text{CuCl}_2 \cdot 2\text{H}_2\text{O}$            | $\text{NiCl}_2 \cdot 6\text{H}_2\text{O}$            | Mixing                   | 71%   | Nanoroad              |
| S5     | KOH           | 4            | $\text{CuCl}_2 \cdot 2\text{H}_2\text{O}$            | $\text{NiCl}_2 \cdot 6\text{H}_2\text{O}$            | One shot                 | 54%   | CS-CNNW (non-uniform) |
| S6     | KOH           | 7            | $\text{CuCl}_2 \cdot 2\text{H}_2\text{O}$            | $\text{NiCl}_2 \cdot 6\text{H}_2\text{O}$            | One shot                 | 77%   | Nanoroad              |
| S7     | KOH           | 10           | $\text{CuCl}_2 \cdot 2\text{H}_2\text{O}$            | $\text{NiCl}_2 \cdot 6\text{H}_2\text{O}$            | One shot                 | 62%   | CS-CNNK (non-uniform) |
| ★S8    | KOH           | 15           | $\text{CuCl}_2 \cdot 2\text{H}_2\text{O}$            | $\text{NiCl}_2 \cdot 6\text{H}_2\text{O}$            | One shot                 | 88%   | CS-CNNK (uniform)     |
| S9     | KOH           | 15           | $\text{CuCl}_2 \cdot 2\text{H}_2\text{O}$            | $\text{NiCl}_2 \cdot 6\text{H}_2\text{O}$            | Mixing                   | 79%   | CS-CNNK               |
| S10    | NaOH          | 15           | $\text{CuCl}_2 \cdot 2\text{H}_2\text{O}$            | $\text{NiCl}_2 \cdot 6\text{H}_2\text{O}$            | Mixing                   | 60%   | Nanoparticle          |
| S11    | NaOH          | 15           | $\text{CuCl}_2 \cdot 2\text{H}_2\text{O}$            | $\text{NiCl}_2 \cdot 6\text{H}_2\text{O}$            | One shot                 | 33%   | Nanoparticle          |

**Table S2.** Magnetic properties of CS-CNNK and CS-CNNW obtained from VSM analyses.

| <b>Sample</b> | <b><math>M_s</math> (emu g<sup>-1</sup>)</b> | <b><math>H_c</math> (Oe)</b> | <b><math>M_r</math> (emu g<sup>-1</sup>)</b> |
|---------------|----------------------------------------------|------------------------------|----------------------------------------------|
| CS-CNNW       | 33.92                                        | 222.52                       | 9.58                                         |
| CS-CNNK       | 36.71                                        | 225.82                       | 6.35                                         |

**Table S3.** Specific surface area and pore volume of CS-CNNW and CS-CNNK obtained from BET and BJH analyses.

| <b>Sample</b> | <b>Volume adsorbed (cm<sup>3</sup> g<sup>-1</sup>)</b> | <b>Surface area (m<sup>2</sup> g<sup>-1</sup>)</b> | <b>Average pore diameter (nm)</b> |
|---------------|--------------------------------------------------------|----------------------------------------------------|-----------------------------------|
| CS-CNNW       | 0.37                                                   | 1.6103                                             | 17.765                            |
| CS-CNNK       | 0.6552                                                 | 2.8519                                             | 19.083                            |



**Table S4.** Details for HBM thermal simulations.

| <b>Component</b>         | <b>Size (x,y,z)<br/>(nm)</b> | <b>Material</b>    | <b>Thermal conductivity<br/>(W m<sup>-1</sup> K<sup>-1</sup>)</b> |
|--------------------------|------------------------------|--------------------|-------------------------------------------------------------------|
| <b>Substrate</b>         | 20, 20, 0.75                 | FR4                | 0.294                                                             |
| <b>Base (Logic) die</b>  | 10.8, 9.8, 0.06              | Si                 | 148                                                               |
| <b>Base die bump gap</b> | 0.053                        | Solder + underfill | 48                                                                |
| <b>Core die</b>          | 10.5, 9.5, 0.05              | Si                 | 148                                                               |
| <b>Top die</b>           | 10.5, 9.5, 0.05              | Si                 | 148                                                               |
| <b>Core die gap</b>      | 0.015                        | LMC                | 1.2 / 1.55 / 1.46                                                 |
| <b>TSV diameter</b>      | 0.015                        | Cu                 | 400                                                               |
| <b>Heat spreader</b>     | 10.8, 9.8, 3                 | Al                 | 237.5                                                             |

**Table S5.** Comparison of thermal conductivity enhancement with different fillers in LMC and epoxy matrix materials at 1 wt.%.

| Matrix            | Material                            | Diameter (nm) | Length (um) | Thermal conductivity (w/m·k) |       |             | Ref.      |
|-------------------|-------------------------------------|---------------|-------------|------------------------------|-------|-------------|-----------|
|                   |                                     |               |             | 0wt%                         | 1wt%  | Enhancement |           |
| LMC               | CS-CNNW                             | 250           | 20          | 1.2                          | 1.55  | 29.2%       | This work |
| LMC               | CS-CNNK                             | 250           | 20          | 1.2                          | 1.46  | 21.7%       |           |
| Epoxy             | Ag NWs                              | 110           | <50         | 0.18                         | 0.23  | 27.8%       | S1        |
| Epoxy             | SiC NWs                             | 190           | 120         | 0.22                         | 0.28  | 27.3%       | S2        |
| Epoxy             | Al <sub>2</sub> O <sub>3</sub> -NWs | 5             | 0.1         | 0.21                         | 0.215 | 2.4%        | S3        |
| Epoxy             | TiO <sub>2</sub> NWs                | 50            | 5           | 0.166                        | 0.173 | 4.2%        | S4        |
| Epoxy+ AlN filler | Si <sub>3</sub> N <sub>4</sub> NWs  | 100           | 20          | 0.73                         | 0.9   | 23.3%       | S5        |
| PDMS              | Ag NWs                              | 500           | 20          | 0.33                         | 0.34  | 3.0%        | S6        |
| Epoxy             | SiC NW+Graphene                     | 75            | <10         | 0.2                          | 0.236 | 18.0%       | S7        |
| PI                | SiC NW+Graphene                     | 20            | 10          | 0.15                         | 0.2   | 33.3%       | S8        |

## Supplementary references

- S1. L. Zhang, W. Zhu, G. Qi, H. Li, D. Qi and S. Qi, *Polymers*, 2022, **14**, 3539.
- S2. D. Shen, Z. Zhan, Z. Liu, Y. Cao, L. Zhou, Y. Liu, W. Dai, K. Nishimura, C. Li and C.-T. Lin, N. Jiang and J. Yu, *Sci. rep.*, 2017, **7**, 2606.
- S3. L. Huang, X. Lv, Y. Tang, G. Ge, P. Zhang and Y. Li, *Polymers*, 2020, **12**, 2126.
- S4. Q. Xie, Y. Cheng, S. Chen, G. Wu, Z. Wang and Z. Jia, *J. Mater. Sci. Mater. Electron.*, 2017, **28**, 17871-17880.
- S5. B. Wang, S. Wan, M. Niu, M. Li, C. Yu, Z. Zhao, W. Xuan, M. Yue, W. Cao and Q. Wang, *Polymers*, 2023, **15**, 4429.
- S6. Z. Huang, W. Wu, D. Drummer, C. Liu, Y. Wang and Z. Wang, *Polymers*, 2021, **13**, 248.
- S7. Y. Wang, J. Yu, W. Dai, D. Wang, Y. Song, H. Bai, X. Zhou, C. Li, C.-T. Lin and N. Jiang, *RSC Adv.*, 2014, **4**, 59409-59417.
- S8. W. Dai, J. Yu, Z. Liu, Y. Wang, Y. Song, J. Lyu, H. Bai, K. Nishimura and N. Jiang, *Composites Part A*, 2015, **76**, 73-81.
